# Supplementary material
Source: PubMed Central journal article supplement (PMC9037600)
Supplement: NIHMS1773276-supplement-Supplementary_Material.pdf [file NIHMS1773276-supplement-Supplementary_Material.pdf]

## Appendix

We identified essential workers using the 2019 American Community Survey (ACS) in which employed individuals report their main occupation. Their occupation is then classified according to the Bureau of Labor Statistics Standard Occupational Classification (SOC) codes.

(<https://www.bls.gov/soc/>) SOC codes are hierarchical; they can have three, four, five or six digits with more digits corresponding to more detailed classifications. For example, a code starting with 29-1 represents the very broad category “Healthcare Diagnosing or Treating Practitioners”. Nested under this category is the title “Therapist” (29-112), a five-digit code, and more detailed six-digit classifications such as 29-1122, “occupational therapist” and 29-1127, “speech-language pathologist”.

Our primary method for identifying which SOC codes described essential workers was via a list of six-digit SOC codes compiled by the Department of Homeland Security’s Labor Market Information (LMI) Institute and the Council for Community and Economic Research (C2ER) (<https://www.lmiontheweb.org/more-than-half-of-u-s-workers-in-critical-occupations-in-the-fight-against-covid-19>). This list was modified by Leah Zallman to exclude SOC codes that start with an 11 (Management Positions) because many such persons can work from home, and to include some additional health, agricultural and food service SOC codes. A list of SOC codes considered essential occupations appears below.

This list of essential six-digit SOC codes was then matched to the SOC codes assigned in the ACS. In the ACS, among adults who reported an occupation, 71% were assigned a six-digit code and 29% reported three- four- or five-digit codes which were not on the list provided by LMI and C2ER.

To tabulate all essential workers we used the imputation method of McCormack et al (<https://pubmed.ncbi.nlm.nih.gov/32556217/>). For those three, four- or five-digit codes which had six-digit codes nested beneath them which were all designated essential or all designated non-essential, we assigned these three- four- or five- digit codes the corresponding status (i.e. essential or non-essential). This was the case for 27% of adults who reported an occupation, leaving 2% of all employed adults with indeterminate essential worker status. For the remaining five-digit codes that had a mix of essential and non-essential six-digit codes nested under them, we used the imputation method described in McCormack et al (<https://pubmed.ncbi.nlm.nih.gov/32556217/>). These workers (representing about 1% of all workers) are included in the total number of essential workers and of immigrant essential workers shown in Exhibit 1. However, they were not included in the remaining exhibits since we are unable to fully identify individual persons and specify their demographic characteristics.

Finally, about 25,000 respondents (about 1% of the adult workers in ACS) reported an occupation for which we were unable to impute a status of essential vs. non-essential since their occupation was assigned a 3- or -4 digit code that was ambiguous as to its essential status, and insufficient information was available on the codes nested beneath it to allow imputation.

## List of Essential SOC Codes

| SOC Code | Description                                                         |
|----------|---------------------------------------------------------------------|
| 13-1021  | Buyers and Purchasing Agents, Farm Products                         |
| 13-1023  | Purchasing Agents, Except Wholesale, Retail, and Farm Products      |
| 13-1041  | Compliance Officers                                                 |
| 13-1081  | Logisticians                                                        |
| 13-2031  | Budget Analysts                                                     |
| 13-2041  | Credit Analysts                                                     |
| 13-2053  | Insurance Underwriters                                              |
| 13-2061  | Financial Examiners                                                 |
| 15-1211  | Computer Systems Analysts                                           |
| 15-1212  | Information Security Analysts                                       |
| 15-1241  | Computer Network Architects                                         |
| 15-1244  | Network and Computer Systems Administrators                         |
| 15-1251  | Computer Programmers                                                |
| 15-1252  | Software Developers                                                 |
| 15-1254  | Web Developers                                                      |
| 15-1299  | Computer Occupations, All Other                                     |
| 17-2011  | Aerospace Engineers                                                 |
| 17-2031  | Bioengineers and Biomedical Engineers                               |
| 17-2041  | Chemical Engineers                                                  |
| 17-2051  | Civil Engineers                                                     |
| 17-2061  | Computer Hardware Engineers                                         |
| 17-2081  | Environmental Engineers                                             |
| 17-2121  | Marine Engineers and Naval Architects                               |
| 17-2131  | Materials Engineers                                                 |
| 17-2141  | Mechanical Engineers                                                |
| 17-2171  | Petroleum Engineers                                                 |
| 17-2199  | Engineers, All Other                                                |
| 17-3023  | Electrical and Electronic Engineering Technologists and Technicians |
| 19-2021  | Atmospheric and Space Scientists                                    |
| 19-3033  | Clinical and Counseling Psychologists                               |
| 19-3034  | School Psychologists                                                |
| 19-4021  | Biological Technicians                                              |
| 19-4031  | Chemical Technicians                                                |
| 21-1011  | Substance Abuse and Behavioral Disorder Counselors                  |
| 21-1014  | Mental Health Counselors                                            |
| 21-1021  | Child, Family, and School Social Workers                            |
| 21-1022  | Healthcare Social Workers                                           |
| 21-1023  | Mental Health and Substance Abuse Social Workers                    |
| 21-1029  | Social Workers, All Other                                           |
| 21-1093  | Social and Human Service Assistants                                 |
| 25-4022  | Librarians and Media Collections Specialists                        |
| 25-4031  | Library Technicians                                                 |
| 27-2012  | Producers and Directors                                             |
| 27-3011  | Broadcast Announcers and Radio Disc Jockeys                         |
| 27-3023  | News Analysts, Reporters, and Journalists                           |
| 29-1031  | Dietitians and Nutritionists                                        |
| 29-1051  | Pharmacists                                                         |
| 29-1071  | Physician Assistants                                                |

|         |                                                                |
|---------|----------------------------------------------------------------|
| 29-1122 | Occupational Therapists                                        |
| 29-1123 | Physical Therapists                                            |
| 29-1124 | Radiation Therapists                                           |
| 29-1126 | Respiratory Therapists                                         |
| 29-1127 | Speech-Language Pathologists                                   |
| 29-1129 | Therapists, All Other                                          |
| 29-1131 | Veterinarians                                                  |
| 29-1141 | Registered Nurses                                              |
| 29-1151 | Nurse Anesthetists                                             |
| 29-1171 | Nurse Practitioners                                            |
| 29-1292 | Dental Hygienists                                              |
| 29-1299 | Healthcare Diagnosing or Treating Practitioners, All Other     |
| 29-2031 | Cardiovascular Technologists and Technicians                   |
| 29-2032 | Diagnostic Medical Sonographers                                |
| 29-2034 | Radiologic Technologists and Technicians                       |
| 29-2035 | Magnetic Resonance Imaging Technologists                       |
| 29-2042 | Emergency Medical Technicians                                  |
| 29-2043 | Paramedics                                                     |
| 29-2052 | Pharmacy Technicians                                           |
| 29-2053 | Psychiatric Technicians                                        |
| 29-2055 | Surgical Technologists                                         |
| 29-2056 | Veterinary Technologists and Technicians                       |
| 29-2061 | Licensed Practical and Licensed Vocational Nurses              |
| 29-2072 | Medical Records Specialists                                    |
| 31-1121 | Home Health Aides                                              |
| 31-1122 | Personal Care Aides                                            |
| 31-1131 | Nursing Assistants                                             |
| 31-9091 | Dental Assistants                                              |
| 31-9092 | Medical Assistants                                             |
| 31-9095 | Pharmacy Aides                                                 |
| 31-9096 | Veterinary Assistants and Laboratory Animal Caretakers         |
| 31-9097 | Phlebotomists                                                  |
| 33-1011 | First-Line Supervisors of Correctional Officers                |
| 33-1012 | First-Line Supervisors of Police and Detectives                |
| 33-1021 | First-Line Supervisors of Firefighting and Prevention Workers  |
| 33-1091 | First-Line Supervisors of Security Workers                     |
| 33-2011 | Firefighters                                                   |
| 33-3012 | Correctional Officers and Jailers                              |
| 33-3021 | Detectives and Criminal Investigators                          |
| 33-9093 | Transportation Security Screeners                              |
| 35-1011 | Chefs and Head Cooks                                           |
| 35-1012 | First-Line Supervisors of Food Preparation and Serving Workers |
| 35-2021 | Food Preparation Workers                                       |
| 35-3023 | Fast Food and Counter Workers                                  |
| 35-3041 | Food Servers, Nonrestaurant                                    |
| 35-9011 | Dining Room and Cafeteria Attendants and Bartender Helpers     |
| 35-9021 | Dishwashers                                                    |
| 35-9031 | Hosts and Hostesses, Restaurant, Lounge, and Coffee Shop       |
| 35-9099 | Food Preparation and Serving Related Workers, All Other        |
| 37-1011 | First-Line Supervisors of Housekeeping and Janitorial Workers  |

|         |                                                                           |
|---------|---------------------------------------------------------------------------|
| 37-2012 | Maids and Housekeeping Cleaners                                           |
| 37-2021 | Pest Control Workers                                                      |
| 37-3013 | Tree Trimmers and Pruners                                                 |
| 39-4031 | Morticians, Undertakers, and Funeral Arrangers                            |
| 41-1011 | First-Line Supervisors of Retail Sales Workers                            |
| 41-3031 | Securities, Commodities, and Financial Services Sales Agents              |
| 43-1011 | First-Line Supervisors of Office and Administrative Support Workers       |
| 43-2011 | Switchboard Operators, Including Answering Service                        |
| 43-2099 | Communications Equipment Operators, All Other                             |
| 43-3011 | Bill and Account Collectors                                               |
| 43-3021 | Billing and Posting Clerks                                                |
| 43-3031 | Bookkeeping, Accounting, and Auditing Clerks                              |
| 43-3061 | Procurement Clerks                                                        |
| 43-3071 | Tellers                                                                   |
| 43-3099 | Financial Clerks, All Other                                               |
| 43-4041 | Credit Authorizers, Checkers, and Clerks                                  |
| 43-4051 | Customer Service Representatives                                          |
| 43-4061 | Eligibility Interviewers, Government Programs                             |
| 43-4131 | Loan Interviewers and Clerks                                              |
| 43-4141 | New Accounts Clerks                                                       |
| 43-4151 | Order Clerks                                                              |
| 43-4161 | Human Resources Assistants, Except Payroll and Timekeeping                |
| 43-4199 | Information and Record Clerks, All Other                                  |
| 43-5011 | Cargo and Freight Agents                                                  |
| 43-5021 | Couriers and Messengers                                                   |
| 43-5031 | Public Safety Telecommunicators                                           |
| 43-5032 | Dispatchers, Except Police, Fire, and Ambulance                           |
| 43-5041 | Meter Readers, Utilities                                                  |
| 43-5051 | Postal Service Clerks                                                     |
| 43-5052 | Postal Service Mail Carriers                                              |
| 43-5053 | Postal Service Mail Sorters, Processors, and Processing Machine Operators |
| 43-5061 | Production, Planning, and Expediting Clerks                               |
| 43-5071 | Shipping, Receiving, and Inventory Clerks                                 |
| 43-5111 | Weighers, Measurers, Checkers, and Samplers, Recordkeeping                |
| 43-6013 | Medical Secretaries and Administrative Assistants                         |
| 43-9021 | Data Entry Keyers                                                         |
| 43-9041 | Insurance Claims and Policy Processing Clerks                             |
| 43-9061 | Office Clerks, General                                                    |
| 43-9199 | Office and Administrative Support Workers, All Other                      |
| 45-1011 | First-Line Supervisors of Farming, Fishing, and Forestry Workers          |
| 45-2011 | Agricultural Inspectors                                                   |
| 45-2041 | Graders and Sorters, Agricultural Products                                |
| 45-3031 | Fishing and Hunting Workers                                               |
| 47-1011 | First-Line Supervisors of Construction Trades and Extraction Workers      |
| 47-2031 | Carpenters                                                                |
| 47-2061 | Construction Laborers                                                     |
| 47-2111 | Electricians                                                              |
| 47-2151 | Pipelayers                                                                |
| 47-2152 | Plumbers, Pipefitters, and Steamfitters                                   |
| 47-4011 | Construction and Building Inspectors                                      |

|         |                                                                                                           |
|---------|-----------------------------------------------------------------------------------------------------------|
| 47-4041 | Hazardous Materials Removal Workers                                                                       |
| 47-4051 | Highway Maintenance Workers                                                                               |
| 47-4061 | Rail-Track Laying and Maintenance Equipment Operators                                                     |
| 47-5023 | Earth Drillers, Except Oil and Gas                                                                        |
| 49-1011 | First-Line Supervisors of Mechanics, Installers, and Repairers                                            |
| 49-2011 | Computer, Automated Teller, and Office Machine Repairers                                                  |
| 49-2091 | Avionics Technicians                                                                                      |
| 49-2092 | Electric Motor, Power Tool, and Related Repairers                                                         |
| 49-2097 | Audiovisual Equipment Installers and Repairers                                                            |
| 49-3011 | Aircraft Mechanics and Service Technicians                                                                |
| 49-3021 | Automotive Body and Related Repairers                                                                     |
| 49-3022 | Automotive Glass Installers and Repairers                                                                 |
| 49-3023 | Automotive Service Technicians and Mechanics                                                              |
| 49-3031 | Bus and Truck Mechanics and Diesel Engine Specialists                                                     |
| 49-9021 | Heating, Air Conditioning, and Refrigeration Mechanics and Installers                                     |
| 49-9031 | Home Appliance Repairers                                                                                  |
| 49-9043 | Maintenance Workers, Machinery                                                                            |
| 49-9051 | Electrical Power-Line Installers and Repairers                                                            |
| 49-9052 | Telecommunications Line Installers and Repairers                                                          |
| 49-9071 | Maintenance and Repair Workers, General                                                                   |
| 51-1011 | First-Line Supervisors of Production and Operating Workers                                                |
| 51-2031 | Engine and Other Machine Assemblers                                                                       |
| 51-2041 | Structural Metal Fabricators and Fitters                                                                  |
| 51-3011 | Bakers                                                                                                    |
| 51-3091 | Food and Tobacco Roasting, Baking, and Drying Machine Operators and Tenders                               |
| 51-3092 | Food Batchmakers                                                                                          |
| 51-3093 | Food Cooking Machine Operators and Tenders                                                                |
| 51-3099 | Food Processing Workers, All Other                                                                        |
| 51-4031 | Cutting, Punching, and Press Machine Setters, Operators, and Tenders, Metal and Plastic                   |
| 51-4033 | Grinding, Lapping, Polishing, and Buffing Machine Tool Setters, Operators, and Tenders, Metal and Plastic |
| 51-4041 | Machinists                                                                                                |
| 51-4111 | Tool and Die Makers                                                                                       |
| 51-6011 | Laundry and Dry-Cleaning Workers                                                                          |
| 51-6031 | Sewing Machine Operators                                                                                  |
| 51-8021 | Stationary Engineers and Boiler Operators                                                                 |
| 51-8031 | Water and Wastewater Treatment Plant and System Operators                                                 |
| 51-9041 | Extruding, Forming, Pressing, and Compacting Machine Setters, Operators, and Tenders                      |
| 51-9051 | Furnace, Kiln, Oven, Drier, and Kettle Operators and Tenders                                              |
| 51-9061 | Inspectors, Testers, Sorters, Samplers, and Weighers                                                      |
| 51-9111 | Packaging and Filling Machine Operators and Tenders                                                       |
| 51-9191 | Adhesive Bonding Machine Operators and Tenders                                                            |
| 51-9194 | Etchers and Engravers                                                                                     |
| 51-9195 | Molders, Shapers, and Casters, Except Metal and Plastic                                                   |
| 51-9196 | Paper Goods Machine Setters, Operators, and Tenders                                                       |
| 51-9197 | Tire Builders                                                                                             |
| 51-9198 | Helpers--Production Workers                                                                               |
| 53-3052 | Bus Drivers, Transit and Intercity                                                                        |
| 53-4031 | Railroad Conductors and Yardmasters                                                                       |
| 53-5011 | Sailors and Marine Oilers                                                                                 |
| 53-6051 | Transportation Inspectors                                                                                 |

|         |                                                        |
|---------|--------------------------------------------------------|
| 53-7021 | Crane and Tower Operators                              |
| 53-7051 | Industrial Truck and Tractor Operators                 |
| 53-7061 | Cleaners of Vehicles and Equipment                     |
| 53-7062 | Laborers and Freight, Stock, and Material Movers, Hand |
| 53-7063 | Machine Feeders and Offbearers                         |
| 53-7064 | Packers and Packagers, Hand                            |
| 53-7065 | Stockers and Order Fillers                             |
| 53-7081 | Refuse and Recyclable Material Collectors              |

**Appendix Exhibit A1 – Characteristics and Service Use of Immigrant Essential Workers and Their Household Members Living in Arizona Who Were at Risk of Immigration Sanctions Due to the Public Charge Rule, 2019**

| <b>Characteristic/Service Use</b>        | <b>Immigrant Essential Workers (Unweighted N=3,218)</b> | <b>Immigrant Essential Workers at Risk of Sanctions (Non-citizens or in Mixed Status Households) (Unweighted N=1,951)</b> | <b>Household Members of Immigrant Essential Workers at Risk of Sanctions* (Unweighted N=3,374)</b> | <b>Total of Immigrant Workers and Their Household Members at Risk of Sanctions (Unweighted N=5,325)</b> |
|------------------------------------------|---------------------------------------------------------|---------------------------------------------------------------------------------------------------------------------------|----------------------------------------------------------------------------------------------------|---------------------------------------------------------------------------------------------------------|
| <b>Total State Wide</b>                  | <b>420,711</b>                                          | <b>279,525</b>                                                                                                            | <b>501,501</b>                                                                                     | <b>781,026</b>                                                                                          |
| <i>Age group</i>                         |                                                         |                                                                                                                           |                                                                                                    |                                                                                                         |
| Less than 18                             | n/a                                                     | n/a                                                                                                                       | 244,090                                                                                            | 244,090                                                                                                 |
| 18 to 64                                 | 393,986                                                 | 266,809                                                                                                                   | 236,772                                                                                            | 503,581                                                                                                 |
| > 65                                     | 26,725                                                  | 12,716                                                                                                                    | 20,639                                                                                             | 33,355                                                                                                  |
| <i>Sex</i>                               |                                                         |                                                                                                                           |                                                                                                    |                                                                                                         |
| Male                                     | 221,064                                                 | 152,756                                                                                                                   | 250,087                                                                                            | 402,843                                                                                                 |
| Female                                   | 199,647                                                 | 126,769                                                                                                                   | 251,414                                                                                            | 378,183                                                                                                 |
| <i>Race/Ethnicity</i>                    |                                                         |                                                                                                                           |                                                                                                    |                                                                                                         |
| Asian/Pacific Islander                   | 69,752                                                  | 39,554                                                                                                                    | 44,455                                                                                             | 84,009                                                                                                  |
| Black/African American                   | 18,077                                                  | 9,682                                                                                                                     | 12,489                                                                                             | 22,171                                                                                                  |
| Hispanic                                 | 270,319                                                 | 201,316                                                                                                                   | 391,050                                                                                            | 592,366                                                                                                 |
| White                                    | 56,647                                                  | 25,813                                                                                                                    | 43,050                                                                                             | 68,863                                                                                                  |
| Another race**                           | 5,916                                                   | 3,160                                                                                                                     | 10,457                                                                                             | 13,617                                                                                                  |
| <i>Insurance</i>                         |                                                         |                                                                                                                           |                                                                                                    |                                                                                                         |
| Medicaid                                 | 58,801                                                  | 44,012                                                                                                                    | 186,760                                                                                            | 230,772                                                                                                 |
| Medicare                                 | 28,602                                                  | 13,440                                                                                                                    | 26,769                                                                                             | 40,209                                                                                                  |
| Private                                  | 221,837                                                 | 125,260                                                                                                                   | 173,979                                                                                            | 299,239                                                                                                 |
| VA                                       | 249                                                     | 189                                                                                                                       | 698                                                                                                | 887                                                                                                     |
| Uninsured***                             | 111,222                                                 | 96,624                                                                                                                    | 113,295                                                                                            | 209,919                                                                                                 |
| <i>Food Stamp Recipient</i>              | 54,697                                                  | 42,974                                                                                                                    | 107,291                                                                                            | 150,265                                                                                                 |
| <i>Welfare Recipient****</i>             | 3,120                                                   | 1,918                                                                                                                     | 3,543                                                                                              | 5,461                                                                                                   |
| <i>Primary Language at Home</i>          |                                                         |                                                                                                                           |                                                                                                    |                                                                                                         |
| English                                  | 62,902                                                  | 32,250                                                                                                                    | 74,500                                                                                             | 106,750                                                                                                 |
| Spanish                                  | 252,896                                                 | 189,118                                                                                                                   | 317,643                                                                                            | 506,761                                                                                                 |
| Other                                    | 104,913                                                 | 58,157                                                                                                                    | 51,725                                                                                             | 109,882                                                                                                 |
| <i>Family income relative to poverty</i> |                                                         |                                                                                                                           |                                                                                                    |                                                                                                         |
| < 201% FPL                               | 144,391                                                 | 111,428                                                                                                                   | 249,135                                                                                            | 360,563                                                                                                 |
| 201-400% FPL                             | 157,136                                                 | 110,488                                                                                                                   | 177,176                                                                                            | 287,664                                                                                                 |
| >400% FPL                                | 115,782                                                 | 54,725                                                                                                                    | 73,586                                                                                             | 128,311                                                                                                 |
| <i>Citizenship</i>                       |                                                         |                                                                                                                           |                                                                                                    |                                                                                                         |
| US born                                  | n/a                                                     | n/a                                                                                                                       | 346,565                                                                                            | 346,565                                                                                                 |
| Naturalized citizen                      | 181,351                                                 | 40,165                                                                                                                    | 27,552                                                                                             | 67,717                                                                                                  |
| Non-citizen                              | 239,360                                                 | 239,360                                                                                                                   | 127,384                                                                                            | 366,744                                                                                                 |

Source: Authors' analysis of 2019 American Community Survey

Notes:

\* All household members of immigrant essential workers who were at risk for sanctions were also considered to be at risk for sanctions.

\*\* Includes Native American/Alaskan Native, more than one race and "other" identified races.

\*\*\* Includes persons covered only by the Indian Health Service.

\*\*\*\* Welfare recipient asked only for persons age 15 and above

SNAP = Supplemental Nutrition Assistance Program

FPL = Federal poverty level.

Immigrant essential workers = non-citizens and naturalized US citizens employed in essential jobs.



**Appendix Exhibit A2 – Characteristics and Service Use of Immigrant Essential Workers and Their Household Members Living in California Who Were at Risk of Immigration Sanctions Due to the Public Charge Rule, 2019**

| <b>Characteristic/Service Use</b>        | <b>Immigrant Essential Workers (Unweighted N=42,036)</b> | <b>Immigrant Essential Workers at Risk of Sanctions (Non-citizens or in Mixed Status Households) (Unweighted N=24,065)</b> | <b>Household Members of Immigrant Essential Workers at Risk of Sanctions* (Unweighted N=39,695)</b> | <b>Total of Immigrant Workers and Their Household Members at Risk of Sanctions (Unweighted N=63,760)</b> |
|------------------------------------------|----------------------------------------------------------|----------------------------------------------------------------------------------------------------------------------------|-----------------------------------------------------------------------------------------------------|----------------------------------------------------------------------------------------------------------|
| <b>Total State Wide</b>                  | <b>4,652,612</b>                                         | <b>2,901,571</b>                                                                                                           | <b>4,957,153</b>                                                                                    | <b>7,858,724</b>                                                                                         |
| <i>Age group</i>                         |                                                          |                                                                                                                            |                                                                                                     |                                                                                                          |
| Less than 18                             | n/a                                                      | n/a                                                                                                                        | 2,234,761                                                                                           | 2,234,761                                                                                                |
| 18 to 64                                 | 4,295,564                                                | 2,769,653                                                                                                                  | 2,391,402                                                                                           | 5,161,055                                                                                                |
| > 65                                     | 357,048                                                  | 131,918                                                                                                                    | 330,990                                                                                             | 462,908                                                                                                  |
| <i>Sex</i>                               |                                                          |                                                                                                                            |                                                                                                     |                                                                                                          |
| Male                                     | 2,500,120                                                | 1,650,376                                                                                                                  | 2,356,689                                                                                           | 4,007,065                                                                                                |
| Female                                   | 2,152,492                                                | 1,251,195                                                                                                                  | 2,600,464                                                                                           | 3,851,659                                                                                                |
| <i>Race/Ethnicity</i>                    |                                                          |                                                                                                                            |                                                                                                     |                                                                                                          |
| Asian/Pacific Islander                   | 1,506,564                                                | 726,257                                                                                                                    | 896,280                                                                                             | 1,622,537                                                                                                |
| Black/African American                   | 80,697                                                   | 36,854                                                                                                                     | 69,762                                                                                              | 106,616                                                                                                  |
| Hispanic                                 | 2,570,631                                                | 1,920,866                                                                                                                  | 3,557,477                                                                                           | 5,478,343                                                                                                |
| White                                    | 435,512                                                  | 190,632                                                                                                                    | 354,878                                                                                             | 545,510                                                                                                  |
| Another race**                           | 1,967                                                    | 26,962                                                                                                                     | 78,756                                                                                              | 105,718                                                                                                  |
| <i>Insurance</i>                         |                                                          |                                                                                                                            |                                                                                                     |                                                                                                          |
| Medicaid                                 | 846,199                                                  | 642,911                                                                                                                    | 2,148,131                                                                                           | 2,791,042                                                                                                |
| Medicare                                 | 343,182                                                  | 129,997                                                                                                                    | 360,632                                                                                             | 490,629                                                                                                  |
| Private                                  | 2,675,672                                                | 1,441,089                                                                                                                  | 1,842,263                                                                                           | 3,283,352                                                                                                |
| VA                                       | 3,273                                                    | 1,814                                                                                                                      | 2,723                                                                                               | 4,537                                                                                                    |
| Uninsured***                             | 784,286                                                  | 685,760                                                                                                                    | 603,404                                                                                             | 1,289,164                                                                                                |
| <i>Food Stamp Recipient</i>              | 477,683                                                  | 360,058                                                                                                                    | 899,759                                                                                             | 1,259,817                                                                                                |
| <i>Welfare Recipient****</i>             | 39,858                                                   | 26,753                                                                                                                     | 41,274                                                                                              | 68,027                                                                                                   |
| <i>Primary Language at Home</i>          |                                                          |                                                                                                                            |                                                                                                     |                                                                                                          |
| English                                  | 421,668                                                  | 178,778                                                                                                                    | 616,939                                                                                             | 795,717                                                                                                  |
| Spanish                                  | 2,473,755                                                | 1,868,835                                                                                                                  | 2,892,870                                                                                           | 4,761,705                                                                                                |
| Other                                    | 1,757,189                                                | 853,958                                                                                                                    | 844,673                                                                                             | 1,698,631                                                                                                |
| <i>Family income relative to poverty</i> |                                                          |                                                                                                                            |                                                                                                     |                                                                                                          |
| < 201% FPL                               | 1,281,038                                                | 1,002,054                                                                                                                  | 2,125,770                                                                                           | 3,127,824                                                                                                |
| 201-400% FPL                             | 1,509,977                                                | 1,019,642                                                                                                                  | 1,685,764                                                                                           | 2,705,406                                                                                                |
| >400% FPL                                | 1,838,981                                                | 864,557                                                                                                                    | 1,136,798                                                                                           | 2,001,355                                                                                                |
| <i>Citizenship</i>                       |                                                          |                                                                                                                            |                                                                                                     |                                                                                                          |
| US born                                  | n/a                                                      | n/a                                                                                                                        | 3,201,630                                                                                           | 3,201,630                                                                                                |
| Naturalized citizen                      | 2,364,591                                                | 613,550                                                                                                                    | 427,099                                                                                             | 1,040,649                                                                                                |
| Non-citizen                              | 2,288,021                                                | 2,288,021                                                                                                                  | 1,328,035                                                                                           | 3,616,056                                                                                                |

Source: Authors' analysis of 2019 American Community Survey

Notes:

\* All household members of immigrant essential workers who were at risk for sanctions were also considered to be at risk for sanctions.

\*\* Includes Native American/Alaskan Native, more than one race and "other" identified races.

\*\*\* Includes persons covered only by the Indian Health Service.

\*\*\*\* Welfare recipient asked only for persons age 15 and above

SNAP = Supplemental Nutrition Assistance Program

FPL = Federal poverty level.

Immigrant essential workers = non-citizens and naturalized US citizens employed in essential jobs.

**Appendix Exhibit A3 – Characteristics and Service Use of Immigrant Essential Workers and Their Household Members Living in New Mexico Who Were at Risk of Immigration Sanctions Due to the Public Charge Rule, 2019**

| <b>Characteristic/Service Use</b>        | <b>Immigrant Essential Workers (Unweighted N=663)</b> | <b>Immigrant Essential Workers at Risk of Sanctions (Non-citizens or in Mixed Status Households) (Unweighted N=411)</b> | <b>Household Members of Immigrant Essential Workers at Risk of Sanctions* (Unweighted N=639)</b> | <b>Total of Immigrant Workers and Their Household Members at Risk of Sanctions (Unweighted N=1050)</b> |
|------------------------------------------|-------------------------------------------------------|-------------------------------------------------------------------------------------------------------------------------|--------------------------------------------------------------------------------------------------|--------------------------------------------------------------------------------------------------------|
| <b>Total State Wide</b>                  | <b>90,416</b>                                         | <b>61,308</b>                                                                                                           | <b>95,936</b>                                                                                    | <b>157,244</b>                                                                                         |
| <i>Age group</i>                         |                                                       |                                                                                                                         |                                                                                                  |                                                                                                        |
| Less than 18                             | n/a                                                   | n/a                                                                                                                     | 48,702                                                                                           | 48,702                                                                                                 |
| 18 to 64                                 | 84,735                                                | 58,483                                                                                                                  | 44,500                                                                                           | 102,983                                                                                                |
| > 65                                     | 5,681                                                 | 2,825                                                                                                                   | 2,734                                                                                            | 5,559                                                                                                  |
| <i>Sex</i>                               |                                                       |                                                                                                                         |                                                                                                  |                                                                                                        |
| Male                                     | 49,912                                                | 36,050                                                                                                                  | 44,867                                                                                           | 80,917                                                                                                 |
| Female                                   | 40,504                                                | 25,258                                                                                                                  | 51,069                                                                                           | 76,327                                                                                                 |
| <i>Race/Ethnicity</i>                    |                                                       |                                                                                                                         |                                                                                                  |                                                                                                        |
| Asian/Pacific Islander                   | 9,799                                                 | 7,710                                                                                                                   | 4,116                                                                                            | 11,826                                                                                                 |
| Black/African American                   | 2,036                                                 | 1,484                                                                                                                   | 903                                                                                              | 2,387                                                                                                  |
| Hispanic                                 | 71,501                                                | 48,823                                                                                                                  | 82,273                                                                                           | 131,096                                                                                                |
| White                                    | 6,023                                                 | 2,143                                                                                                                   | 7,781                                                                                            | 9,924                                                                                                  |
| Another race**                           | 1,057                                                 | 1,148                                                                                                                   | 863                                                                                              | 2,011                                                                                                  |
| <i>Insurance</i>                         |                                                       |                                                                                                                         |                                                                                                  |                                                                                                        |
| Medicaid                                 | 16,935                                                | 11,566                                                                                                                  | 47,803                                                                                           | 59,369                                                                                                 |
| Medicare                                 | 5,585                                                 | 2,493                                                                                                                   | 4,256                                                                                            | 6,749                                                                                                  |
| Private                                  | 37,267                                                | 21,305                                                                                                                  | 21,975                                                                                           | 43,280                                                                                                 |
| VA                                       | -                                                     | -                                                                                                                       | -                                                                                                | -                                                                                                      |
| Uninsured***                             | 30,629                                                | 25,944                                                                                                                  | 21,902                                                                                           | 47,846                                                                                                 |
| <i>Food Stamp Recipient</i>              | 15,996                                                | 12,151                                                                                                                  | 22,543                                                                                           | 34,694                                                                                                 |
| <i>Welfare Recipient****</i>             | 1,207                                                 | 744                                                                                                                     | 441                                                                                              | 1,185                                                                                                  |
| <i>Primary Language at Home</i>          |                                                       |                                                                                                                         |                                                                                                  |                                                                                                        |
| English                                  | 7,323                                                 | 3,318                                                                                                                   | 14,061                                                                                           | 17,379                                                                                                 |
| Spanish                                  | 67,834                                                | 49,307                                                                                                                  | 64,381                                                                                           | 113,688                                                                                                |
| Other                                    | 15,259                                                | 8,683                                                                                                                   | 5,528                                                                                            | 14,211                                                                                                 |
| <i>Family income relative to poverty</i> |                                                       |                                                                                                                         |                                                                                                  |                                                                                                        |
| < 201% FPL                               | 39,728                                                | 29,195                                                                                                                  | 51,301                                                                                           | 80,496                                                                                                 |
| 201-400% FPL                             | 29,202                                                | 21,110                                                                                                                  | 33,296                                                                                           | 54,406                                                                                                 |
| >400% FPL                                | 19,896                                                | 9,502                                                                                                                   | 11,201                                                                                           | 20,703                                                                                                 |
| <i>Citizenship</i>                       |                                                       |                                                                                                                         |                                                                                                  |                                                                                                        |
| US born                                  | n/a                                                   | n/a                                                                                                                     | 69,957                                                                                           | 69,957                                                                                                 |
| Naturalized citizen                      | 35,723                                                | 6,615                                                                                                                   | 4,357                                                                                            | 10,972                                                                                                 |
| Non-citizen                              | 54,693                                                | 54,693                                                                                                                  | 21,622                                                                                           | 76,315                                                                                                 |

Source: Authors' analysis of 2019 American Community Survey

Notes:

\* All household members of immigrant essential workers who were at risk for sanctions were also considered to be at risk for sanctions.

\*\* Includes Native American/Alaskan Native, more than one race and "other" identified races.

\*\*\* Includes persons covered only by the Indian Health Service.

\*\*\*\* Welfare recipient asked only for persons age 15 and above

SNAP = Supplemental Nutrition Assistance Program

FPL = Federal poverty level.

Immigrant essential workers = non-citizens and naturalized US citizens employed in essential jobs.

**Appendix Exhibit A4 – Characteristics and Service Use of Immigrant Essential Workers and Their Household Members Living in Texas Who Were at Risk of Immigration Sanctions Due to the Public Charge Rule, 2019**

| <b>Characteristic/Service Use</b>        | <b>Immigrant Essential Workers (Unweighted N=17,169)</b> | <b>Immigrant Essential Workers at Risk of Sanctions (Non-citizens or in Mixed Status Households) (Unweighted N=11,195)</b> | <b>Household Members of Immigrant Essential Workers at Risk of Sanctions* (Unweighted N=18,362)</b> | <b>Total of Immigrant Workers and Their Household Members at Risk of Sanctions (Unweighted N=29,557)</b> |
|------------------------------------------|----------------------------------------------------------|----------------------------------------------------------------------------------------------------------------------------|-----------------------------------------------------------------------------------------------------|----------------------------------------------------------------------------------------------------------|
| <b>Total State Wide</b>                  | <b>2,244,671</b>                                         | <b>1,588,801</b>                                                                                                           | <b>2,698,467</b>                                                                                    | <b>4,287,268</b>                                                                                         |
| <i>Age group</i>                         |                                                          |                                                                                                                            |                                                                                                     |                                                                                                          |
| Less than 18                             | n/a                                                      | n/a                                                                                                                        | 1,378,860                                                                                           | 1,378,860                                                                                                |
| 18 to 64                                 | 2,115,836                                                | 1,527,611                                                                                                                  | 1,201,585                                                                                           | 2,729,196                                                                                                |
| > 65                                     | 128,835                                                  | 61,190                                                                                                                     | 118,022                                                                                             | 179,212                                                                                                  |
| <i>Sex</i>                               |                                                          |                                                                                                                            |                                                                                                     |                                                                                                          |
| Male                                     | 1,265,470                                                | 928,779                                                                                                                    | 1,281,489                                                                                           | 2,210,268                                                                                                |
| Female                                   | 979,201                                                  | 660,022                                                                                                                    | 1,416,978                                                                                           | 2,077,000                                                                                                |
| <i>Race/Ethnicity</i>                    |                                                          |                                                                                                                            |                                                                                                     |                                                                                                          |
| Asian/Pacific Islander                   | 446,694                                                  | 246,479                                                                                                                    | 290,240                                                                                             | 536,719                                                                                                  |
| Black/African American                   | 152,654                                                  | 98,299                                                                                                                     | 122,948                                                                                             | 221,247                                                                                                  |
| Hispanic                                 | 1,481,436                                                | 1,159,762                                                                                                                  | 2,076,932                                                                                           | 3,236,694                                                                                                |
| White                                    | 142,129                                                  | 74,075                                                                                                                     | 185,767                                                                                             | 259,842                                                                                                  |
| Another race**                           | 21,758                                                   | 10,186                                                                                                                     | 22,580                                                                                              | 32,766                                                                                                   |
| <i>Insurance</i>                         |                                                          |                                                                                                                            |                                                                                                     |                                                                                                          |
| Medicaid                                 | 77,481                                                   | 58,471                                                                                                                     | 783,177                                                                                             | 841,648                                                                                                  |
| Medicare                                 | 114,802                                                  | 48,433                                                                                                                     | 113,806                                                                                             | 162,239                                                                                                  |
| Private                                  | 1,215,019                                                | 749,138                                                                                                                    | 926,109                                                                                             | 1,675,247                                                                                                |
| VA                                       | 1,617                                                    | 210                                                                                                                        | 1,970                                                                                               | 2,180                                                                                                    |
| Uninsured***                             | 835,752                                                  | 732,549                                                                                                                    | 873,405                                                                                             | 1,605,954                                                                                                |
| <i>Food Stamp Recipient</i>              | 263,981                                                  | 210,164                                                                                                                    | 578,557                                                                                             | 788,721                                                                                                  |
| <i>Welfare Recipient****</i>             | 7,385                                                    | 4,906                                                                                                                      | 9,840                                                                                               | 14,746                                                                                                   |
| <i>Primary Language at Home</i>          |                                                          |                                                                                                                            |                                                                                                     |                                                                                                          |
| English                                  | 215,196                                                  | 116,117                                                                                                                    | 324,009                                                                                             | 440,126                                                                                                  |
| Spanish                                  | 1,430,782                                                | 1,125,993                                                                                                                  | 1,688,010                                                                                           | 2,814,003                                                                                                |
| Other                                    | 598,693                                                  | 346,691                                                                                                                    | 310,299                                                                                             | 656,990                                                                                                  |
| <i>Family income relative to poverty</i> |                                                          |                                                                                                                            |                                                                                                     |                                                                                                          |
| < 201% FPL                               | 772,913                                                  | 635,850                                                                                                                    | 1,363,595                                                                                           | 1,999,445                                                                                                |
| 201-400% FPL                             | 779,144                                                  | 570,437                                                                                                                    | 878,518                                                                                             | 1,448,955                                                                                                |
| >400% FPL                                | 674,220                                                  | 368,565                                                                                                                    | 450,802                                                                                             | 819,367                                                                                                  |
| <i>Citizenship</i>                       |                                                          |                                                                                                                            |                                                                                                     |                                                                                                          |
| US born                                  | n/a                                                      | n/a                                                                                                                        | 1,760,375                                                                                           | 1,760,375                                                                                                |
| Naturalized citizen                      | 896,190                                                  | 240,320                                                                                                                    | 143,424                                                                                             | 383,744                                                                                                  |
| Non-citizen                              | 1,348,481                                                | 1,348,481                                                                                                                  | 793,769                                                                                             | 2,142,250                                                                                                |

Source: Authors' analysis of 2019 American Community Survey

Notes:

\* All household members of immigrant essential workers who were at risk for sanctions were also considered to be at risk for sanctions.

\*\* Includes Native American/Alaskan Native, more than one race and "other" identified races.

\*\*\* Includes persons covered only by the Indian Health Service.

\*\*\*\* Welfare recipient asked only for persons age 15 and above

SNAP = Supplemental Nutrition Assistance Program

FPL = Federal poverty level.

Immigrant essential workers = non-citizens and naturalized US citizens employed in essential jobs.
